# Supplementary material
Source: PubMed Central journal article supplement (PMC1544190)

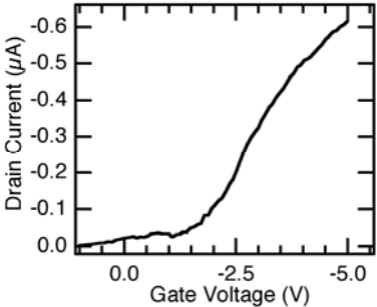

Supplement: pnas_0601675103_1.pdf [file pnas_0601675103_1.pdf]

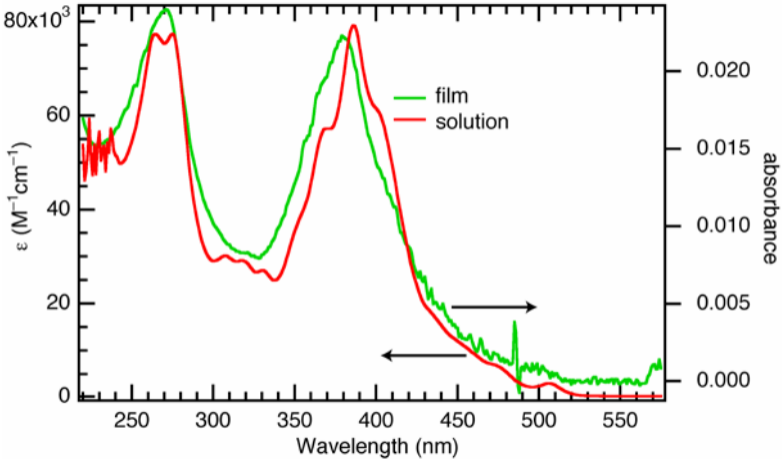

Supplement: pnas_0601675103_2.pdf [file pnas_0601675103_2.pdf]

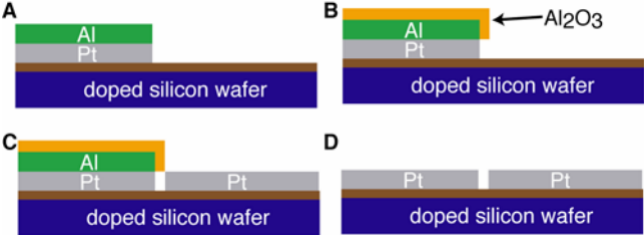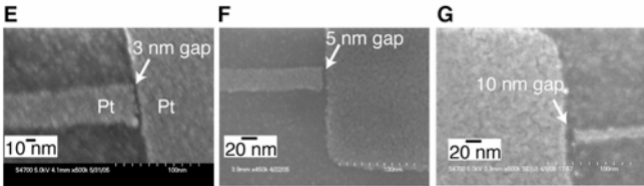

Supplement: pnas_0601675103_3.pdf [file pnas_0601675103_3.pdf]

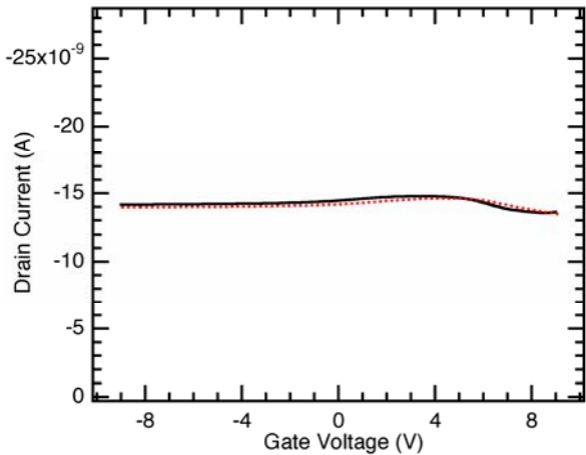

Supplement: pnas_0601675103_4.pdf [file pnas_0601675103_4.pdf]
